# Supplementary material for: Development a cross-protective subunit cocktail vaccine against diverse serotypes of Glaesserella parasuis infection in pigs
Source: Research Square preprint supplement (doi:10.21203/rs.3.rs-8593719/v1), 2026-01-28
Supplement: Supplementary file 1 [file 0e4a061bd8588c228f45d525.docx]

**Additional file 3.** Prediction of antigenicity of the selected seventeen antigens using VaxiJen V2.0 server.

| **Antigens** | **PotD** | **MnSOD** | | **GPD** | **YgiW** | **Omp26** | **QseB** | **GAPDH** |
| --- | --- | --- | --- | --- | --- | --- | --- | --- |
| **VaxiJen score** | 0.3103 | 0.4995 | 0.3270 | | 0.4885 | 0.5328 | 0.4273 | 0.6018 |
| **Antigens** | **TEX** | **PalA** | **ApbE** | | **PtsG** | **HutZ** | **KefA** | **VacJ** |
| **VaxiJen score** | 0.4574 | 0.7039 | 0.5503 | | 0.4529 | 0.4084 | 0.4371 | 0.4913 |
| **Antigens** | **ClpP** | **CRP** | **QueA** | |  |  |  |  |
| **VaxiJen score** | 0.4254 | 0.3163 | 0.4707 | |  |  |  |  |
