# Supplementary material for: Development a cross-protective subunit cocktail vaccine against diverse serotypes of Glaesserella parasuis infection in pigs
Source: Research Square preprint supplement (doi:10.21203/rs.3.rs-8593719/v1), 2026-01-28
Supplement: Supplementary file 2 [file 75ba5c2a790fe70809056e2c.docx]

**Additional file 2**. Primers used in this study.

| Primers | Sequence (5’-3’) |
| --- | --- |
| Gene cloning | |
| MnSOD-F | GCGGGATCCATGGCATACACATTACC |
| MnSOD-R | GCGCTCGAGTTATGCTTGGGATTCAAAA |
| PotD-F | CGCGGATCCCATCTTTATACTTGGACAGA |
| PotD-R | CCGCTCGAGTTACTTCGCAGCTTTTAACT |
| GPD-F | GCGGGATCCATGAAAGCAGACAATAATTG |
| GPD-R | GCGCTCGAGTTACACTTTTTTCTTCATCAA |
| PA-F | GCGGGATCCATGAAAAAACTAGCTAAAG |
| PA-R | GCGCTCGAGTTAGTACTCTAACACTGCA |
| YGIW-F | GCGGGATCCATGACATTGAAAAAATATT |
| YGIW-R | GCGCTCGAGTTATCTTTCAAATTTCACC |
| QseB-F | GCGGATCCATGCGTATTTTATTAATTGAAGAC |
| QseB-R | CGCCTCGAGTTAAGCAACTTCATCGTTTTT |
| GA-F | GCGGATCCATGGCAATTAAAATTG |
| GA-R | GCCTCGAGTTAGCCTTTGTAGTTG |
| Omp26-F | CCGGATCCAAAAATTTATTTAAACTTGC |
| Omp26-R | GGCTCGAGTTTTTCACTTCTTCTGG |
| PT-F | GCGGATCCATGTTCAAATTTATTAAAAACCTG |
| PT-R | CGCCTCGAGTTTTTTTAAAATAGCATTAATCGC |
| VA-F | GCGGATCCACCTCTTCTATTGATCCTGAAACTG |
| VA-R | CGCCTCGAGATCAATATTTTTTAGCTGTTCTTC |
| Tex-F | GCGGATCCATGACAGAACTCAACCACCAA |
| Tex-R | CGCCTCGAGCTTCTTCCACCCCTTCAAC |
| HutZ-F | GCGGATCCATGTCAAATCGTCAAGAAGTATTAC |
| HutZ-R | CGCCTCGAGTGCCTCTTTCTCGTGCGGAC |
| apbE-F | GCGGATCCAATAAAGAACCCCAACAAATTGC |
| apbE-R | CGCCTCGAGTTTTTGATTAATTAATTTTTCAAAGGC |
| kefA-F | GCGGATCCGTGGAAGATTTTGTGTCTGCG |
| kefA-R | CGCCTCGAGGTTCTGCCCCAAATTTTCAAAG |
| CRP-F | GCGGATCCATGCAAGATGTTTCAATCTCAACC |
| CRP-R | CGCCTCGAGTCTTGTCCCATACACAACGAT |
| Clpp-F | GCGGATCCATGGCTGTAATCCCTATGGTC |
| Clpp-R | CGCCTCGAGTCTCTTTGTTACAACGTCATCAATTAA |
| QueA-F | GCGGATCCGTGCGTGTAACCGATTTCC |
| QueA-R | CGCCTCGAGGGGAACATCCCCCAACGC |
| qRT-PCR primers | |
| il-6-F | CTTCTTGGGACTGATGCTGGTGAC |
| il-6-R | TCTGTTGGGAGTGGTATCCTCTGTG |
| TNF-a-F | CCCTCACACTCACAAACCAC |
| TNF-a-R | ACAAGGTACAACCCATCGGC |
| IL-1β-F | TGGACCTTCCAGGATGAGGACA |
| IL-1β-R | GTTCATCTCGGAGCCTGTAGTG |
| GAPDH-F | TGAGCCTCCTCCAATTCAACC |
| GAPDH-R | AAATCCGTTCACACCGACCT |
| IFN-γ F | CTGGAGGAACTGGCAAAAGGATGG |
| IFN-γ R | GACGCT TATGTTGTTGCTGATGGC |
| IL-2 F | TCCTCTCCAGGGAGCTAACA |
| IL-2 R | ATTCCAAAACCAGCAACCCATC |
| IL-4 F | TCTTGATAAAACTTAATTGTCTCTCGTCAC |
| IL-4 R | GCAGGATGACAAACTAGCTGGG |
| GAPDH F | GCAAATTCAACGGCACAGTCAAG |
| GAPDH R | TCGCTCCTGGAAGATGGTGATG |
