# Supplementary material for: Development a cross-protective subunit cocktail vaccine against diverse serotypes of Glaesserella parasuis infection in pigs
Source: Research Square preprint supplement (doi:10.21203/rs.3.rs-8593719/v1), 2026-01-28
Supplement: Supplementary file 3 [file 8452f8d5df2545c35be7767a.docx]

**Additional file 9.** Clinical symptoms of the piglets after challenge by GPS5.

| Groups | DPI1 | ABT2 | MS3 |  | Breath | Posture | appetite |
| --- | --- | --- | --- | --- | --- | --- | --- |
| PBS + Adjuvant | 1 | 39.4 | depressed |  | normal | normal | normal |
| 2 | 40.1 | depressed |  | normal | lie down | normal |
| 3 | 40.2 | depressed |  | ND4 | lie down | inappetence |
| 4 | 40.2 | depressed |  | ND | lie down | inappetence |
| 5 | 39.5 | depressed |  | ND | lie down | inappetence |
| 6 | 39.6 | normal |  | ND | normal | normal |
| Vaccine | 1 | 39.1 | normal |  | normal | lie down | normal |
| 2 | 40.0 | depressed |  | normal | lie down | inappetence |
| 3 | 39.8 | depressed |  | ND | lie down | inappetence |
| 4 | 39.0 | normal |  | ND | normal | enormous |
| 5 | 39.1 | normal |  | normal | normal | enormous |
|  | 6 | 39.3 | normal |  | normal | normal | normal |

1DPI, days post infection. 2ABT, average body temperature. 3MS, mental status. 4ND, nasal discharge.
