# Supplementary material for: Development a cross-protective subunit cocktail vaccine against diverse serotypes of Glaesserella parasuis infection in pigs
Source: Research Square preprint supplement (doi:10.21203/rs.3.rs-8593719/v1), 2026-01-28
Supplement: Supplementary file 4 [file a5adb494d429ef72849c7c0e.docx]

**Additional file 1.** Bacterial strains and plasmids used in this study

| Bacterial strains | Descriptiona | Source |
| --- | --- | --- |
| *G. parasuis* 4 | GPS4 | This study |
| *G. parasuis* 5 | GPS5 | This study |
| *E. coli* DH5α | λφ80d*lacZ* ΔM15 Δ(*lacZYA*-argF)U169  *recA1* *endA1 hsdR17*(rK- mK- ) *supE44*  *thi-1 gyrA relA1* | New England Biolabs |
| *E. coli* BL21 (DE3) | F- *ompT hsdSB*(r-Bm-B) *gal dcm* (DE3) | Novagen |
| Plasmids | |  |
| pET32a | Expression vector with T7 promoter, Ampr | Novagen |
| pET28a | Expression vector with T7 promoter, Kanar | Novagen |
| pET32a::potD | pET32a inserted with synthesized *potD*, Ampr | This study |
| pET32a::mnsod | pET32a inserted with synthesized *mnsod*, Ampr | This study |
| pET32a::gpd | pET32a inserted with synthesized gpd, Ampr | This study |
| pET32a::ygiw | pET32a inserted with *ygiw*, Ampr | This study |
| pET32a::omp26 | pET32a inserted with *omp26*, Ampr | This study |
| pET32a::crp | pET32a inserted with *crp*, Ampr | This study |
| pET32a::vacj | pET32a inserted with *vacj*, Ampr | This study |
| pET32a::ptsG | pET32a inserted with *ptsG*, Ampr | This study |
| pET32a::qseB | pET32a inserted with *qseB*, Ampr | This study |
| pET32a::kefA | pET32a inserted with *kefA*, Ampr | This study |
| pET32a::Hutz | pET32a inserted with *hutz*, Ampr | This study |
| pET28a::palA | pET28a inserted with *palA*, Kanar | This study |
| pET28a::tex | pET28a inserted with *tex*, Kanar | This study |
| pET28a::apbE | pET28a inserted with *apbE*, Kanar | This study |
| pET28a::clpp | pET28a inserted with *clpp*, Kanar | This study |
| pET32a::queA | pET32a inserted with *queA*, Ampr | This study |
| pET28a::GAPDH | pET28a inserted with *GAPDH*, Kanar | This study |

aAmpr, ampicillin resistance; Kanar, kanamycin resistance
